# Supplementary material
Source: Springer Nature journal article supplement (https://www.springermedizin.de/resource/supplementary/12958_2012_962_MOESM5_ESM.pdf/9566474)

Nv (mast cells/mm<sup>3</sup> of fibromuscular stroma)

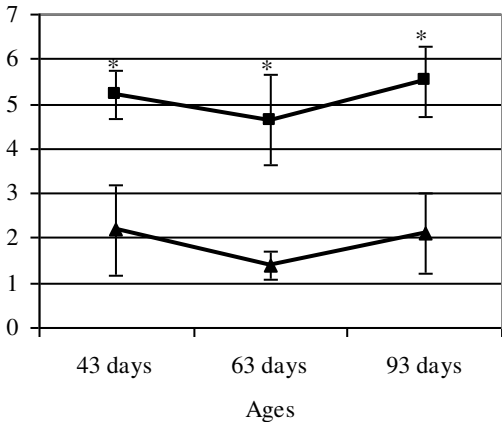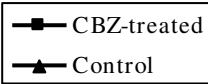

Supplement: MOESM5 [file 9566474]
